# Supplementary material for: What's the gap? A possible strategy for advancing theory, and an appeal for experimental structure data to drive that advance
Source: Royal Society of Chemistry journal article supplement (doi:10.1039/d0ra07496a), 2020-01-01
Supplement: d0ra07496a1.pdf [file d0ra07496a1.pdf]

Supplementary Information to accompany:

What's the gap? A possible strategy for advancing theory, and an appeal for experimental structure data to drive that advance.

Karl Sohlberg<sup>††\*</sup> and Mike Foster<sup>†\*</sup>,

Department of Chemistry and Department of Materials Science & Engineering, Drexel University, Philadelphia, PA, 19104

<sup>†</sup>Department of Chemistry, Drexel University, Philadelphia, PA, 19104

<sup>‡</sup>Department of Materials Science & Engineering, Drexel University, Philadelphia, PA, 19104

\*Authors for correspondence

| C60      |                    |                    |        |                           | Benzene           |                    | Propene            |                    |                    |                   |
|----------|--------------------|--------------------|--------|---------------------------|-------------------|--------------------|--------------------|--------------------|--------------------|-------------------|
| %HF      | C=C                | C-C                | BLA    | BG                        | C...C             | BG                 | C=C                | C-C                | BLA                | BG                |
| 5        | 1.4018             | 1.4546             | 0.0528 | 1.936                     | 1.4006            | 5.603              | 1.3393             | 1.4998             | 0.1605             | 6.138             |
| 10       | 1.3990             | 1.4527             | 0.0537 | 2.207                     | 1.39872           | 6.013              | 1.3370             | 1.4983             | 0.1613             | 6.613             |
| 15       | 1.3962             | 1.4509             | 0.0547 | 2.481                     | 1.39650           | 6.425              | 1.3349             | 1.4970             | 0.1621             | 7.087             |
| 20       | 1.3935             | 1.4491             | 0.0556 | 2.757                     | 1.39432           | 6.837              | 1.3328             | 1.4957             | 0.1629             | 7.561             |
| 25       | 1.3909             | 1.4474             | 0.0565 | 3.035                     | 1.39272           | 7.243              | 1.3308             | 1.4943             | 0.1635             | 8.035             |
| 30       | 1.3883             | 1.4458             | 0.0575 | 3.315                     | 1.39088           | 7.652              | 1.3288             | 1.493              | 0.1642             | 8.509             |
| 35       | 1.3857             | 1.4442             | 0.0585 | 3.598                     | 1.38908           | 8.059              | 1.3268             | 1.4916             | 0.1648             | 8.982             |
| 40       | 1.3832             | 1.4427             | 0.0595 | 3.882                     | 1.38732           | 8.466              | 1.3249             | 1.4903             | 0.1654             | 9.456             |
| 45       | 1.3807             | 1.4412             | 0.0605 | 4.169                     | 1.38562           | 8.872              | 1.3231             | 1.4890             | 0.1659             | 9.929             |
| 50       | 1.3789             | 1.4394             | 0.0605 | 4.449                     | 1.38398           | 9.277              | 1.3213             | 1.4877             | 0.1664             | 10.401            |
| 55       | 1.3766             | 1.4380             | 0.0614 | 4.738                     | 1.38238           | 9.682              | 1.3195             | 1.4864             | 0.1669             | 10.873            |
| 60       | 1.3744             | 1.4366             | 0.0622 | 5.028                     | 1.38078           | 10.085             | 1.3178             | 1.4851             | 0.1673             | 11.345            |
| 65       | 1.3722             | 1.4353             | 0.0631 | 5.321                     | 1.37924           | 10.489             | 1.3161             | 1.4839             | 0.1678             | 11.817            |
| 70       | 1.3700             | 1.4339             | 0.0639 | 5.614                     | 1.37772           | 10.891             | 1.3144             | 1.4827             | 0.1683             | 12.288            |
| 75       | 1.3679             | 1.4327             | 0.0648 | 5.910                     | 1.37628           | 11.293             | 1.3128             | 1.4814             | 0.1686             | 12.759            |
| 80       | 1.3659             | 1.4314             | 0.0655 | 6.207                     | 1.37482           | 11.694             | 1.3112             | 1.4802             | 0.1690             | 13.229            |
| 85       | 1.3638             | 1.4302             | 0.0664 | 6.505                     | 1.37342           | 12.094             | 1.3097             | 1.4790             | 0.1693             | 13.700            |
| 90       | 1.3618             | 1.4291             | 0.0673 | 6.806                     | 1.37208           | 12.494             | 1.3081             | 1.4779             | 0.1698             | 14.170            |
| 95       | 1.3599             | 1.4280             | 0.0681 | 7.108                     | 1.37028           | 12.899             | 1.3067             | 1.4768             | 0.1701             | 14.639            |
| expt     | 1.401 <sup>1</sup> | 1.458 <sup>1</sup> | 0.057  | 4.66...4.9 <sup>2,3</sup> | 1.39 <sup>4</sup> | 6.966 <sup>4</sup> | 1.353 <sup>4</sup> | 1.488 <sup>4</sup> | 0.135 <sup>4</sup> | 6.8 <sup>4*</sup> |
| best %HF | 10                 | 0                  | 27.5   | 55                        | 20-45             | 22                 | 0                  | 45                 | 0                  | 12                |

**Table S1.** HOMO-LUMO gap and various structural parameters in C<sub>60</sub>, benzene and propene as a function of %HF exchange used in PBEh. Results are reported to several digits of precision for comparison purposes. The number of digits is not intended to imply computational accuracy. \*denotes theoretical CCSD(T) value in lieu of expt. data.

## References for SI:

- 1 Hedberg, K. *et al.* Bond lengths in free molecules of buckminsterfullerene, C<sub>60</sub>, from gas-phase electron diffraction. *Science* **254**, 410-412 (1991).
- 2 Wang, X.-B., Ding, C.-F. & Wang, L.-S. High resolution photoelectron spectroscopy of C<sub>60</sub>. *The Journal of Chemical Physics* **110**, 8217-8220, doi:10.1063/1.478732 (1999).
- 3 Blase, X., Attaccalite, C. & Olevano, V. First-principles *GW* calculations for fullerenes, porphyrins, phtalocyanine, and other molecules of interest for organic photovoltaic applications. *Physical Review B* **83**, 115103, doi:10.1103/PhysRevB.83.115103 (2011).
- 4 Johnson, R. D. I. Vol. Number 101 (NIST Standard Reference Database, 2019).
